# Supplementary material for: Effectiveness of spiritual interventions on psychological outcomes and quality of life among paediatric patients with cancer: a study protocol for a systematic review
Source: HighWire-hosted journal article supplement (doi:10.1136/bmjopen-2022-070810), 2023-03-01
Supplement: bmjopen-2022-070810supp002_data_supplement.pdf [file bmjopen-2022-070810supp002_data_supplement.pdf]

**Supplementary material****PubMed Search**

|    |                                                                                                                                                                                                                              |
|----|------------------------------------------------------------------------------------------------------------------------------------------------------------------------------------------------------------------------------|
| #1 | ("pediatrics"[MeSH] OR "paediatric*" OR "pediatric*" OR "child"[MeSH] OR "Adolescent"[MeSH])                                                                                                                                 |
| #2 | ("neoplasms"[MeSH] OR "cancer*")                                                                                                                                                                                             |
| #3 | ("Spirituality"[MeSH] OR "Spiritualism"[Mesh] OR "Spiritual Therapies"[Mesh] OR "spiritual*" OR "existential" OR "Religion"[MeSH] OR "narrative therapy" OR "Creative arts therapy" OR "Meditation" [MeSH] OR "Mindfulness") |
| #4 | ("randomized controlled trial" OR "randomized controlled trials as topic*" OR "controlled clinical trial")                                                                                                                   |
| #5 | #1 AND #2 AND #3 AND #4                                                                                                                                                                                                      |

**Embase Search**

|    |                                                                                                                                                                                                                                                                    |
|----|--------------------------------------------------------------------------------------------------------------------------------------------------------------------------------------------------------------------------------------------------------------------|
| #1 | 'pediatrics'/exp OR 'child'/exp                                                                                                                                                                                                                                    |
| #2 | 'malignant neoplasm'/exp OR cancer*:ti,ab OR neoplasm*:ti,ab                                                                                                                                                                                                       |
| #3 | 'religion'/exp OR 'spiritual healing'/exp OR 'spiritual care'/exp OR spiritual*:ti,ab OR existential*:ti,ab OR narrative*:ti,ab OR 'creative arts therapy':ti,ab OR 'music therapy':ti,ab OR 'mindfulness meditation'/exp OR meditation:ti,ab OR mindfulness:ti,ab |
| #4 | 'randomized controlled trial (topic)/exp OR 'controlled clinical trial (topic)/exp                                                                                                                                                                                 |
| #5 | #1 AND #2 AND #3 AND #4                                                                                                                                                                                                                                            |

**CINAL Search via EBSCOhost**

|    |                                                                                                                                                                                                                                                                                                                   |
|----|-------------------------------------------------------------------------------------------------------------------------------------------------------------------------------------------------------------------------------------------------------------------------------------------------------------------|
| S1 | (MH "Pediatrics+") OR (MH "Child+") OR (MH "Adolescence+")                                                                                                                                                                                                                                                        |
| S2 | (MH "Neoplasms+") OR "cancer"                                                                                                                                                                                                                                                                                     |
| S3 | (MH "Spiritual Healing+") OR (MH "Spiritual Care+") OR (MH "Spirituality+") OR "spiritual" OR (MH "Religion and Religions+") OR (MH "Narratives+") OR (MH "Storytelling+") OR (MH "Art Therapy") OR (MH "Nursing as an Art") OR "creative arts therapy" OR (MH "Art+") OR (MH "Meditation") OR (MH "Mindfulness") |
| S4 | (MH "Randomized Controlled Trials+")                                                                                                                                                                                                                                                                              |
| S5 | S1 AND S2 AND S3 AND S4                                                                                                                                                                                                                                                                                           |

**Note:** These search terms for the three databases will be adjusted to the other electronic databases, registers, and websites.
